# Supplementary material for: Puppet resting behavior in the Tibetan antelope (Pantholops hodgsonii)
Source: PLoS One. 2018 Dec 27;13(12):e0204379. doi: 10.1371/journal.pone.0204379 (PMC6307704; doi:10.1371/journal.pone.0204379)
Supplement: S1 Dataset — (XLSX) [file pone.0204379.s001.xlsx]

## Sheet: Sheet1
year	time	time type	id	weather	groupsize	group id	sex	age	sex-age	videolength	if puppet behavior	last time	proportion	number	average	bed length	if bed	if either	proportion of bed	proportion of rest
2016	10:22:00	1	211	1	2	G67	female	adult	1	00:11:01	0		0			00:02:27	1	1	22.24	22.24
2016	09:50:00	1	250	1	40	G37	female	adult	1	00:19:29	0		0				0	0	0	0
2016	10:22:00	1	255	1	2	G67	female	adult	1	00:07:52	0		0				0	0	0	0
2016	09:15:00	1	206	2	400	G36	female	adult	1	00:04:32	0		0				0	0	0	0
2016	09:20:00	1	207	2	400	G36	female	adult	1	00:09:13	0		0				0	0	0	0
2016	09:03:00	1	208	2	180	G44	female	adult	1	00:12:28	0		0				0	0	0	0
2016	09:25:00	1	209	2	170	G65	female	adult	1	00:14:32	0		0				0	0	0	0
2016	09:45:00	1	210	2	8	G66	female	adult	1	00:14:24	0		0				0	0	0	0
2016	10:03:00	1	212	2	40	G68	female	adult	1	00:14:36	0		0			00:01:29	1	1	10.16	10.16
2016	10:00:00	1	215	2	84	G93	female	adult	1	00:12:31	0		0				0	0	0	0
2016	10:18:00	1	216	2	84	G93	female	adult	1	00:13:22	0		0				0	0	0	0
2016	10:44:00	1	217	2	84	G93	female	adult	1	00:10:45	0		0			00:02:10	1	1	20.16	20.16
2016	11:36:00	1	218	2	50	G94	female	adult	1	00:05:57	0		0				0	0	0	0
2016	09:20:00	1	222	2	13	G101	female	adult	1	00:13:02	0		0			00:01:34	1	1	12.02	12.02
2016	10:30:00	1	223	2	1	G103	female	adult	1	00:13:42	0		0				0	0	0	0
2016	09:15:00	1	229	2	245	G117	female	adult	1	00:14:39	0		0			00:08:20	1	1	56.88	56.88
2016	09:38:00	1	230	2	245	G117	female	adult	1	00:14:16	0		0				0	0	0	0
2016	10:00:00	1	231	2	245	G117	female	adult	1	00:13:35	0		0			00:04:05	1	1	30.06	30.06
2016	10:30:00	1	232	2	245	G117	female	adult	1	00:13:58	0		0			00:00:16	1	1	1.91	1.91
2016	11:00:00	1	233	2	110	G118	female	adult	1	00:14:27	0		0				0	0	0	0
2016	09:14:00	1	235	2	120	G150	female	adult	1	00:10:10	0		0				0	0	0	0
2016	09:45:00	1	236	2	160	G151	female	adult	1	00:14:07	0		0				0	0	0	0
2016	09:50:00	1	241	2	310	G175	female	adult	1	00:15:02	0		0				0	0	0	0
2016	10:25:00	1	242	2	310	G175	female	adult	1	00:12:00	0		0			00:06:52	1	1	57.22	57.22
2016	11:07:00	1	243	2	200	G176	female	adult	1	00:13:17	0		0				0	0	0	0
2016	11:39:00	1	244	2	110	G177	female	adult	1	00:08:28	0		0				0	0	0	0
2016	09:09:00	1	245	2	100	G194	female	adult	1	00:15:00	0		0				0	0	0	0
2016	09:28:00	1	246	2	100	G194	female	adult	1	00:14:01	0		0				0	0	0	0
2016	10:45:00	1	247	2	5	G196	female	adult	1	00:13:31	0		0				0	0	0	0
2016	09:30:00	1	249	2	400	G36	female	adult	1	00:10:51	0		0			00:02:30	1	1	23.04	23.04
2016	09:03:00	1	251	2	180	G44	female	adult	1	00:15:18	0		0			00:01:04	1	1	6.97	6.97
2016	09:19:00	1	252	2	180	G44	female	adult	1	00:15:21	0		0				0	0	0	0
2016	10:00:00	1	253	2	60	G46	female	adult	1	00:15:07	0		0				0	0	0	0
2016	09:25:00	1	254	2	170	G65	female	adult	1	00:15:58	0		0			00:03:56	1	1	24.63	24.63
2016	10:03:00	1	256	2	40	G68	female	adult	1	00:08:17	0		0				0	0	0	0
2016	10:12:00	1	257	2	40	G68	female	adult	1	00:10:41	0		0				0	0	0	0
2016	10:00:00	1	259	2	84	G93	female	adult	1	00:16:03	0		0				0	0	0	0
2016	10:18:00	1	260	2	84	G93	female	adult	1	00:16:13	0		0				0	0	0	0
2016	10:44:00	1	261	2	84	G93	female	adult	1	00:15:57	0		0				0	0	0	0
2016	11:36:00	1	262	2	50	G94	female	adult	1	00:05:42	0		0				0	0	0	0
2016	11:49:00	1	263	2	50	G94	female	adult	1	00:14:39	0		0				0	0	0	0
2016	09:20:00	1	266	2	13	G101	female	adult	1	00:14:21	0		0				0	0	0	0
2016	10:55:00	1	267	2	6	G104	female	adult	1	00:14:35	0		0				0	0	0	0
2016	09:15:00	1	272	2	245	G117	female	adult	1	00:16:00	0		0				0	0	0	0
2016	10:00:00	1	274	2	245	G117	female	adult	1	00:15:17	0		0			00:05:17	1	1	34.57	34.57
2016	10:38:00	1	275	2	245	G117	female	adult	1	00:16:16	0		0			00:07:46	1	1	47.75	47.75
2016	11:00:00	1	276	2	110	G118	female	adult	1	00:14:54	0		0				0	0	0	0
2016	09:45:00	1	279	2	160	G151	female	adult	1	00:15:20	0		0				0	0	0	0
2016	09:50:00	1	284	2	310	G175	female	adult	1	00:16:22	0		0				0	0	0	0
2016	10:25:00	1	285	2	310	G175	female	adult	1	00:11:50	0		0			00:05:40	1	1	47.89	47.89
2016	11:07:00	1	286	2	200	G176	female	adult	1	00:15:14	0		0				0	0	0	0
2016	11:39:00	1	287	2	110	G177	female	adult	1	00:12:10	0		0				0	0	0	0
2016	09:09:00	1	288	2	100	G194	female	adult	1	00:16:21	0		0				0	0	0	0
2016	09:28:00	1	289	2	100	G194	female	adult	1	00:14:48	0		0				0	0	0	0
2016	10:13:00	1	290	2	5	G196	female	adult	1	00:16:56	0		0				0	0	0	0
2016	11:10:00	1	294	2	8	G61	female	adult	1	00:10:09	0		0				0	0	0	0
2016	09:20:00	1	214	3	3	G92	female	adult	1	00:05:32	0		0				0	0	0	0
2016	09:12:00	1	240	3	280	G173	female	adult	1	00:14:02	0		0				0	0	0	0
2016	09:15:00	1	248	3	31	G26	female	adult	1	00:13:48	0		0				0	0	0	0
2016	09:12:00	1	283	3	280	G173	female	adult	1	00:15:02	0		0			00:04:33	1	1	30.27	30.27
2016	15:30:00	2	219	3	2	G96	female	adult	1	00:13:22	0		0				0	0	0	0
2016	15:17:00	2	237	3	20	G170	female	adult	1	00:14:14	0		0				0	0	0	0
2016	15:40:00	2	238	3	60	G171	female	adult	1	00:08:42	0		0				0	0	0	0
2016	15:17:00	2	280	3	20	G170	female	adult	1	00:17:56	0		0				0	0	0	0
2016	15:40:00	2	281	3	60	G171	female	adult	1	00:15:05	0		0				0	0	0	0
2016	15:28:00	2	300	3	10	G95	female	adult	1	00:11:41	0		0				0	0	0	0
2016	15:28:00	2	301	3	10	G95	female	adult	1	00:07:07	0		0				0	0	0	0
2016	15:28:00	2	302	3	10	G95	female	adult	1	00:17:59	0		0				0	0	0	0
2016	17:17:00	3	204	2	2	G10	female	adult	1	00:12:37	0		0				0	0	0	0
2016	17:40:00	3	213	2	45	G91	female	adult	1	00:12:52	0		0				0	0	0	0
2016	16:53:00	3	226	2	2	G113	female	adult	1	00:07:50	0		0				0	0	0	0
2016	17:15:00	3	227	2	11	G114	female	adult	1	00:14:21	0		0				0	0	0	0
2016	17:40:00	3	228	2	80	G116	female	adult	1	00:12:16	0		0			00:06:18	1	1	51.36	51.36
2016	17:40:00	3	258	2	45	G91	female	adult	1	00:14:40	0		0				0	0	0	0
2016	16:06:00	3	264	2	46	G97	female	adult	1	00:11:58	0		0				0	0	0	0
2016	16:53:00	3	269	2	2	G113	female	adult	1	00:06:18	0		0				0	0	0	0
2016	17:50:00	3	291	2	3	G43	female	adult	1	00:18:07	0		0			00:01:18	1	1	7.18	7.18
2016	17:50:00	3	292	2	3	G43	female	adult	1	00:12:18	0		0			00:00:28	1	1	3.79	3.79
2016	17:50:00	3	293	2	3	G43	female	adult	1	00:19:10	0		0			00:03:38	1	1	18.96	18.96
2016	16:32:00	3	295	2	5	G89	female	adult	1	00:15:39	0		0			00:01:22	1	1	8.73	8.73
2016	16:32:00	3	296	2	5	G89	female	adult	1	00:15:21	0		0			00:02:26	1	1	15.85	15.85
2016	16:32:00	3	297	2	5	G89	female	adult	1	00:15:39	0		0			00:01:07	1	1	7.14	7.14
2016	16:32:00	3	298	2	5	G89	female	adult	1	00:15:23	0		0				0	0	0	0
2016	16:32:00	3	299	2	5	G89	female	adult	1	00:15:23	0		0			00:02:07	1	1	13.76	13.76
2016	17:38:00	3	303	2	2	G25	female	adult	1	00:11:07	0		0			00:02:56	1	1	26.39	26.39
2016	16:06:00	3	220	3	46	G97	female	adult	1	00:13:22	0		0				0	0	0	0
2016	17:00:00	3	221	3	11	G98	female	adult	1	00:08:29	0		0				0	0	0	0
2016	16:14:00	3	239	3	17	G172	female	adult	1	00:13:24	0		0				0	0	0	0
2016	17:00:00	3	265	3	11	G98	female	adult	1	00:11:34	0		0				0	0	0	0
2016	16:14:00	3	282	3	17	G172	female	adult	1	00:14:27	0		0				0	0	0	0
2016	10:55:00	1	224	2	6	G104	female	adult	1	00:09:27	1	00:03:57	41.8	3	00:01:19		0	1	0	41.8
2016	12:05:00	1	234	2	125	G120	female	adult	1	00:14:00	1	00:00:44	5.24	3	00:00:15		0	1	0	5.24
2016	17:18:00	3	205	2	1	G24	female	adult	1	00:14:21	1	00:05:22	37.4	4	00:01:20	00:00:36	1	1	4.18	41.58
2016	16:22:00	3	225	2	2	G112	female	adult	1	00:15:43	1	00:01:13	7.74	1	00:01:13		0	1	0	7.74
2016	16:22:00	3	268	2	2	G112	female	adult	1	00:14:27	1	00:00:10	1.15	1	00:00:10		0	1	0	1.15
2016	17:40:00	3	271	2	10	G115	female	adult	1	00:13:53	1	00:00:18	2.16	1	00:00:18		0	1	0	2.16
2016	09:38:00	1	273	2	245	G117	female	subadult	2	00:15:55	0		0				0	0	0	0
2016	12:05:00	1	277	2	125	G120	female	subadult	2	00:11:42	0		0				0	0	0	0
2016	09:14:00	1	278	2	80	G149	female	subadult	2	00:14:30	0		0				0	0	0	0
2016	17:15:00	3	270	2	11	G114	female	subadult	2	00:15:25	0		0			00:08:46	1	1	56.86	56.86
2016	17:38:00	3	304	2	2	G25	female	subadult	2	00:11:07	0		0			00:04:05	1	1	36.73	36.73
2016	11:30:00	1	120	2	3	G4	male	adult	3	00:07:45	0		0				0	0	0	0
2016	10:30:00	1	126	2	1	G48	male	adult	3	00:12:55	0		0				0	0	0	0
2016	11:30:00	1	134	2	3	G4	male	adult	3	00:08:02	0		0				0	0	0	0
2016	11:48:00	1	136	2	2	G15	male	adult	3	00:09:55	0		0			00:06:00	1	1	60.5	60.5
2016	10:15:00	1	127	3	2	G59	male	adult	3	00:04:08	0		0				0	0	0	0
2016	12:55:00	1	137	3	4	G17	male	adult	3	00:13:55	0		0				0	0	0	0
2016	14:47:00	2	121	2	2	G7	male	adult	3	00:15:11	0		0				0	0	0	0
2016	13:53:00	2	128	2	1	G70	male	adult	3	00:14:18	0		0			00:01:49	1	1	12.7	12.7
2016	14:50:00	2	129	2	1	G71	male	adult	3	00:16:26	0		0				0	0	0	0
2016	14:47:00	2	135	2	2	G7	male	adult	3	00:12:24	0		0				0	0	0	0
2016	13:15:00	2	140	2	10	G52	male	adult	3	00:15:01	0		0			00:00:10	1	1	1.11	1.11
2016	15:01:00	2	146	2	8	G41	male	adult	3	00:07:11	0		0				0	0	0	0
2016	15:01:00	2	147	2	8	G41	male	adult	3	00:14:20	0		0				0	0	0	0
2016	15:01:00	2	148	2	8	G41	male	adult	3	00:05:45	0		0				0	0	0	0
2016	15:01:00	2	149	2	8	G41	male	adult	3	00:14:30	0		0				0	0	0	0
2016	15:01:00	2	150	2	8	G41	male	adult	3	00:05:44	0		0				0	0	0	0
2016	13:15:00	2	153	2	10	G52	male	adult	3	00:05:24	0		0				0	0	0	0
2016	14:50:00	2	174	2	7	G87	male	adult	3	00:08:18	0		0				0	0	0	0
2016	14:50:00	2	177	2	7	G87	male	adult	3	00:09:48	0		0				0	0	0	0
2016	15:02:00	2	185	2	9	G145	male	adult	3	00:19:24	0		0				0	0	0	0
2016	14:55:00	2	123	3	1	G20	male	adult	3	00:15:24	0		0				0	0	0	0
2016	15:18:00	2	124	3	2	G21	male	adult	3	00:12:32	0		0				0	0	0	0
2016	14:55:00	2	138	3	1	G19	male	adult	3	00:15:49	0		0				0	0	0	0
2016	15:18:00	2	139	3	1	G20	male	adult	3	00:12:43	0		0			00:00:39	1	1	5.11	5.11
2016	12:40:00	1	132	2	1	G84	male	adult	3	00:12:57	1	00:01:12	9.27	1	00:01:12		0	1	0	9.27
2016	12:40:00	1	143	2	3	G85	male	adult	3	00:15:07	1	00:00:39	4.3	4	00:00:10	00:00:32	1	1	3.53	7.83
2016	11:55:00	1	194	2	9	G83	male	adult	3	00:19:09	1	00:11:58	62.49	2	00:05:59		0	1	0	62.49
2016	11:55:00	1	195	2	9	G83	male	adult	3	00:18:19	1	00:16:56	92.45	3	00:05:39		0	1	0	92.45
2016	11:55:00	1	196	2	9	G83	male	adult	3	00:18:14	1	00:07:41	42.14	2	00:03:51	00:10:16	1	1	56.31	98.45
2016	11:55:00	1	197	2	9	G83	male	adult	3	00:18:14	1	00:09:55	54.39	2	00:04:58	00:07:12	1	1	39.49	93.88
2016	11:55:00	1	198	2	9	G83	male	adult	3	00:18:14	1	00:16:55	92.78	3	00:05:38		0	1	0	92.78
2016	11:55:00	1	199	2	9	G83	male	adult	3	00:14:30	1	00:13:18	91.72	2	00:06:39		0	1	0	91.72
2016	12:34:00	1	201	2	4	G108	male	adult	3	00:14:10	1	00:00:17	2	3	00:00:06		0	1	0	2
2016	12:34:00	1	202	2	4	G108	male	adult	3	00:01:33	1	00:01:10	75.27	2	00:00:35		0	1	0	75.27
2016	12:34:00	1	203	2	4	G108	male	adult	3	00:14:43	1	00:03:35	24.35	7	00:00:31		0	1	0	24.35
2016	13:40:00	2	133	2	1	G86	male	adult	3	00:13:14	1	00:01:32	11.59	2	00:00:46		0	1	0	11.59
2016	15:15:00	2	141	2	3	G72	male	adult	3	00:18:23	1	00:00:53	4.81	1	00:00:53		0	1	0	4.81
2016	13:15:00	2	151	2	10	G52	male	adult	3	00:11:28	1	00:00:49	7.12	2	00:00:24		0	1	0	7.12
2016	13:15:00	2	152	2	10	G52	male	adult	3	00:10:30	1	00:00:04	0.63	1	00:00:04		0	1	0	0.63
2016	14:50:00	2	173	2	7	G87	male	adult	3	00:01:48	1	00:01:03	58.33	1	00:01:03		0	1	0	58.33
2016	14:50:00	2	175	2	7	G87	male	adult	3	00:23:48	1	00:10:46	45.24	4	00:02:42	00:00:18	1	1	1.26	46.5
2016	14:50:00	2	176	2	7	G87	male	adult	3	00:15:20	1	00:00:37	4.02	2	00:00:19	00:04:22	1	1	28.48	32.5
2016	15:39:00	2	178	2	2	G88	male	adult	3	00:15:19	1	00:08:49	57.56	4	00:02:12		0	1	0	57.56
2016	15:39:00	2	179	2	2	G88	male	adult	3	00:16:18	1	00:09:25	57.77	5	00:01:53	00:03:53	1	1	23.82	81.59
2016	15:02:00	2	182	2	9	G145	male	adult	3	00:15:29	1	00:13:19	86.01	5	00:02:40		0	1	0	86.01
2016	15:02:00	2	183	2	9	G145	male	adult	3	00:24:29	1	00:00:12	0.82	5	00:00:02		0	1	0	0.82
2016	15:02:00	2	184	2	9	G145	male	adult	3	00:10:47	1	00:09:29	87.94	6	00:01:35		0	1	0	87.94
2016	15:02:00	2	186	2	9	G145	male	adult	3	00:15:30	1	00:00:10	1.08	2	00:00:05		0	1	0	1.08
2016	14:07:00	2	187	2	3	G169	male	adult	3	00:10:35	1	00:00:04	0.63	1	00:00:04		0	1	0	0.63
2016	14:11:00	2	190	2	4	G40	male	adult	3	00:24:19	1	00:04:27	18.3	5	00:00:53		0	1	0	18.3
2016	14:11:00	2	191	2	4	G40	male	adult	3	00:23:51	1	00:01:43	7.2	2	00:00:51		0	1	0	7.2
2016	14:11:00	2	193	2	4	G40	male	adult	3	00:24:20	1	00:04:43	19.38	3	00:01:34		0	1	0	19.38
2016	17:29:00	3	142	2	1	G76	male	adult	3	00:14:38	1	00:02:31	17.2	10	00:00:15		0	1	0	17.2
2016	16:40:00	3	155	2	4	G56	male	adult	3	00:07:45	1	00:01:30	19.35	5	00:00:18		0	1	0	19.35
2016	16:40:00	3	156	2	4	G56	male	adult	3	00:07:41	1	00:03:03	39.7	7	00:00:26		0	1	0	39.7
2016	16:00:00	3	157	2	3	G73	male	adult	3	00:20:09	1	00:07:09	35.48	5	00:01:26		0	1	0	35.48
2016	16:00:00	3	158	2	3	G73	male	adult	3	00:10:27	1	00:05:24	51.67	5	00:01:05		0	1	0	51.67
2016	16:00:00	3	159	2	3	G73	male	adult	3	00:08:51	1	00:01:37	18.27	2	00:00:48		0	1	0	18.27
2016	16:34:00	3	160	2	8	G74	male	adult	3	00:01:17	1	00:01:00	77.92	2	00:00:30		0	1	0	77.92
2016	16:34:00	3	161	2	8	G74	male	adult	3	00:22:16	1	00:05:05	22.83	4	00:01:16		0	1	0	22.83
2016	16:34:00	3	162	2	8	G74	male	adult	3	00:01:04	1	00:00:28	43.75	1	00:00:28		0	1	0	43.75
2016	16:34:00	3	163	2	8	G74	male	adult	3	00:01:01	1	00:01:01	100	1	00:01:01		0	1	0	100
2016	16:34:00	3	164	2	8	G74	male	adult	3	00:01:56	1	00:01:18	67.24	2	00:00:39		0	1	0	67.24
2016	16:34:00	3	165	2	8	G74	male	adult	3	00:22:16	1	00:02:06	9.43	3	00:00:42		0	1	0	9.43
2016	16:34:00	3	166	2	8	G74	male	adult	3	00:22:16	1	00:14:56	67.07	7	00:02:08		0	1	0	67.07
2016	16:34:00	3	167	2	8	G74	male	adult	3	00:22:16	1	00:19:33	87.8	7	00:02:48		0	1	0	87.8
2016	17:00:00	3	168	2	6	G75	male	adult	3	00:17:12	1	00:12:15	71.22	5	00:02:27		0	1	0	71.22
2016	17:00:00	3	169	2	6	G75	male	adult	3	00:17:12	1	00:06:53	40.02	7	00:00:59	00:03:33	1	1	20.64	60.66
2016	17:00:00	3	170	2	6	G75	male	adult	3	00:17:12	1	00:00:46	4.46	1	00:00:46	00:03:36	1	1	20.93	25.39
2016	17:00:00	3	171	2	6	G75	male	adult	3	00:17:12	1	00:05:37	32.66	5	00:01:07	00:07:15	1	1	42.15	74.81
2016	17:00:00	3	172	2	6	G75	male	adult	3	00:17:12	1	00:14:10	82.36	4	00:03:33		0	1	0	82.36
2016	12:00:00	1	144	2	1	G106	male	subadult	4	00:14:44	0		0				0	0	0	0
2016	12:55:00	1	122	3	4	G17	male	subadult	4	00:13:17	0		0				0	0	0	0
2016	13:15:00	2	154	2	10	G52	male	subadult	4	00:07:14	0		0				0	0	0	0
2016	14:11:00	2	192	2	4	G40	male	subadult	4	00:05:13	0		0				0	0	0	0
2016	14:55:00	2	145	3	6	G183	male	subadult	4	00:10:36	0		0				0	0	0	0
2016	14:55:00	2	188	3	6	G183	male	subadult	4	00:11:43	0		0				0	0	0	0
2016	14:55:00	2	189	3	6	G183	male	subadult	4	00:16:02	0		0				0	0	0	0
2016	16:23:00	3	125	2	1	G22	male	subadult	4	00:14:17	0		0				0	0	0	0
2016	16:05:00	3	180	3	2	G124	male	subadult	4	00:23:53	0		0				0	0	0	0
2016	16:05:00	3	181	3	2	G124	male	subadult	4	00:23:53	0		0				0	0	0	0
2016	11:55:00	1	131	2	9	G83	male	subadult	4	00:09:25	1	00:05:02	53.45	4	00:01:15	00:00:58	1	1	10.27	63.72
2016	11:55:00	1	200	2	9	G83	male	subadult	4	00:14:30	1	00:09:06	62.76	4	00:02:16		0	1	0	62.76
2016	15:15:00	2	130	2	3	G72	male	subadult	4	00:14:58	1	00:03:12	21.38	1	00:03:12	00:00:44	1	1	4.9	26.28
2017	11:07:00	1	15	1	3	Q28	male	adult	3	00:03:16	0		0				0	0	0	0
2017	10:03:00	1	57	1	3	Q27	male	adult	3	00:10:16	0		0				0	0	0	0
2017	09:50:00	1	68	1	3	Q33	male	adult	3	00:20:07	0		0				0	0	0	0
2017	09:50:00	1	70	1	3	Q33	male	adult	3	00:09:35	0		0				0	0	0	0
2017	09:38:00	1	71	1	4	Q34	male	adult	3	00:15:12	0		0				0	0	0	0
2017	09:38:00	1	72	1	4	Q34	male	adult	3	00:10:30	0		0				0	0	0	0
2017	11:40:00	1	73	1	1	Q35	male	adult	3	00:10:50	0		0				0	0	0	0
2017	12:59:00	1	74	1	4	Q36	male	adult	3	00:06:42	0		0				0	0	0	0
2017	12:59:00	1	75	1	4	Q36	male	adult	3	00:08:32	0		0				0	0	0	0
2017	12:59:00	1	76	1	4	Q36	male	adult	3	00:16:04	0		0			00:00:44	1	1	4.56	4.56
2017	12:59:00	1	77	1	4	Q36	male	adult	3	00:15:01	0		0				0	0	0	0
2017	10:05:00	1	4	2	12	Q12	male	adult	3	00:16:48	0		0			00:00:21	1	1	2.08	2.08
2017	10:05:00	1	5	2	12	Q12	male	adult	3	00:20:08	0		0				0	0	0	0
2017	10:05:00	1	6	2	12	Q12	male	adult	3	00:20:08	0		0				0	0	0	0
2017	10:05:00	1	89	2	12	Q12	male	adult	3	00:17:13	0		0				0	0	0	0
2017	10:05:00	1	90	2	12	Q12	male	adult	3	00:17:13	0		0			00:02:05	1	1	12.1	12.1
2017	10:05:00	1	91	2	12	Q12	male	adult	3	00:17:13	0		0			00:03:16	1	1	18.97	18.97
2017	09:55:00	1	115	2	4	Q44	male	adult	3	00:11:26	0		0			00:02:45	1	1	24.05	24.05
2017	09:55:00	1	117	2	4	Q44	male	adult	3	00:11:09	0		0			00:05:06	1	1	45.74	45.74
2017	09:53:00	1	10	3	8	Q19	male	adult	3	00:02:27	0		0				0	0	0	0
2017	09:53:00	1	11	3	8	Q19	male	adult	3	00:13:40	0		0				0	0	0	0
2017	09:53:00	1	12	3	8	Q19	male	adult	3	00:15:31	0		0			00:00:15	1	1	1.61	1.61
2017	10:02:00	1	17	3	3	Q14	male	adult	3	00:14:57	0		0				0	0	0	0
2017	10:36:00	1	31	3	4	Q17	male	adult	3	00:10:40	0		0				0	0	0	0
2017	11:50:00	1	32	3	2	Q18	male	adult	3	00:22:32	0		0				0	0	0	0
2017	11:50:00	1	33	3	2	Q18	male	adult	3	00:22:32	0		0				0	0	0	0
2017	09:55:00	1	34	3	8	Q19	male	adult	3	00:14:22	0		0				0	0	0	0
2017	09:55:00	1	35	3	8	Q19	male	adult	3	00:04:55	0		0				0	0	0	0
2017	11:52:00	1	36	3	8	Q20	male	adult	3	00:01:18	0		0				0	0	0	0
2017	11:52:00	1	37	3	8	Q20	male	adult	3	00:04:55	0		0				0	0	0	0
2017	11:52:00	1	38	3	8	Q20	male	adult	3	00:02:11	0		0				0	0	0	0
2017	15:32:00	2	114	1	1	Q43	male	adult	3	00:12:01	0		0				0	0	0	0
2017	13:55:00	2	41	2	5	Q21	male	adult	3	00:14:35	0		0				0	0	0	0
2017	13:55:00	2	42	2	5	Q21	male	adult	3	00:09:27	0		0				0	0	0	0
2017	13:55:00	2	43	2	5	Q21	male	adult	3	00:09:35	0		0				0	0	0	0
2017	13:58:00	2	63	2	2	Q30	male	adult	3	00:01:27	0		0				0	0	0	0
2017	14:56:00	2	87	2	2	Q8	male	adult	3	00:11:42	0		0				0	0	0	0
2017	13:00:00	2	92	2	4	Q13	male	adult	3	00:13:48	0		0				0	0	0	0
2017	13:00:00	2	94	2	4	Q13	male	adult	3	00:17:13	0		0			00:04:50	1	1	28.07	28.07
2017	14:37:00	2	7	3	17	Q16	male	adult	3	00:13:00	0		0				0	0	0	0
2017	14:37:00	2	8	3	17	Q16	male	adult	3	00:17:41	0		0			00:01:37	1	1	9.14	9.14
2017	14:37:00	2	9	3	17	Q16	male	adult	3	00:16:46	0		0			00:01:06	1	1	6.56	6.56
2017	13:21:00	2	18	3	8	Q15	male	adult	3	00:04:41	0		0			00:00:19	1	1	6.76	6.76
2017	13:21:00	2	19	3	8	Q15	male	adult	3	00:08:35	0		0			00:00:50	1	1	9.71	9.71
2017	13:21:00	2	20	3	8	Q15	male	adult	3	00:15:42	0		0				0	0	0	0
2017	14:38:00	2	22	3	17	Q16	male	adult	3	00:15:56	0		0				0	0	0	0
2017	14:38:00	2	23	3	17	Q16	male	adult	3	00:15:08	0		0				0	0	0	0
2017	15:29:00	2	24	3	17	Q16	male	adult	3	00:11:44	0		0				0	0	0	0
2017	15:29:00	2	25	3	17	Q16	male	adult	3	00:15:53	0		0				0	0	0	0
2017	15:29:00	2	26	3	17	Q16	male	adult	3	00:02:18	0		0				0	0	0	0
2017	15:29:00	2	27	3	17	Q16	male	adult	3	00:15:06	0		0				0	0	0	0
2017	15:32:00	2	66	3	2	Q32	male	adult	3	00:01:10	0		0				0	0	0	0
2017	15:32:00	2	67	3	2	Q32	male	adult	3	00:15:11	0		0				0	0	0	0
2017	15:17:00	2	88	3	1	Q9	male	adult	3	00:06:23	0		0				0	0	0	0
2017	17:01:00	3	53	1	1	Q24	male	adult	3	00:14:35	0		0				0	0	0	0
2017	17:50:00	3	13	2	14	Q26	male	adult	3	00:16:02	0		0				0	0	0	0
2017	17:50:00	3	14	2	14	Q26	male	adult	3	00:01:42	0		0				0	0	0	0
2017	17:09:00	3	54	2	7	Q25	male	adult	3	00:03:17	0		0				0	0	0	0
2017	17:52:00	3	55	2	14	Q26	male	adult	3	00:13:41	0		0			00:04:52	1	1	35.57	35.57
2017	17:52:00	3	56	2	14	Q26	male	adult	3	00:03:53	0		0				0	0	0	0
2017	12:25:00	1	3	1	2	Q6	male	adult	3	00:12:35	1	00:01:42	13.51	5	00:00:20		0	1	0	13.51
2017	11:07:00	1	16	1	3	Q28	male	adult	3	00:20:18	1	00:02:58	14.61	4	00:00:45		0	1	0	14.61
2017	11:05:00	1	58	1	3	Q28	male	adult	3	00:29:39	1	00:18:07	61.1	9	00:02:01		0	1	0	61.1
2017	11:05:00	1	59	1	3	Q28	male	adult	3	00:23:58	1	00:12:14	51.04	4	00:03:04		0	1	0	51.04
2017	11:37:00	1	60	1	3	Q28	male	adult	3	00:14:48	1	00:00:25	2.82	1	00:00:25		0	1	0	2.82
2017	11:37:00	1	61	1	3	Q28	male	adult	3	00:14:48	1	00:01:53	12.73	2	00:00:57		0	1	0	12.73
2017	12:01:00	1	107	2	4	Q41	male	adult	3	00:13:23	1	00:11:11	83.56	5	00:02:14		0	1	0	83.56
2017	12:01:00	1	109	2	4	Q41	male	adult	3	00:15:08	1	00:10:32	69.6	4	00:02:38	00:01:07	1	1	7.38	76.98
2017	10:36:00	1	29	3	4	Q17	male	adult	3	00:17:30	1	00:00:15	1.43	1	00:00:15		0	1	0	1.43
2017	11:52:00	1	39	3	8	Q20	male	adult	3	00:15:50	1	00:01:24	8.84	1	00:01:24		0	1	0	8.84
2017	11:52:00	1	40	3	8	Q20	male	adult	3	00:08:06	1	00:00:16	3.29	1	00:00:16		0	1	0	3.29
2017	15:12:00	2	46	1	3	Q22	male	adult	3	00:12:46	1	00:06:01	47.13	6	00:01:00		0	1	0	47.13
2017	15:12:00	2	47	1	3	Q22	male	adult	3	00:12:46	1	00:10:23	81.33	7	00:01:29		0	1	0	81.33
2017	15:12:00	2	48	1	3	Q22	male	adult	3	00:12:46	1	00:09:05	71.15	6	00:01:31		0	1	0	71.15
2017	13:50:00	2	83	1	3	Q4	male	adult	3	00:17:13	1	00:08:35	49.85	5	00:01:43		0	1	0	49.85
2017	13:50:00	2	84	1	3	Q4	male	adult	3	00:17:13	1	00:06:50	39.69	5	00:01:22		0	1	0	39.69
2017	14:20:00	2	85	1	2	Q6	male	adult	3	00:17:13	1	00:04:04	23.62	3	00:01:21	00:04:18	1	1	24.98	48.6
2017	14:04:00	2	96	1	4	Q38	male	adult	3	00:16:39	1	00:13:43	82.38	9	00:01:31	00:00:41	1	1	4.1	86.48
2017	14:04:00	2	97	1	4	Q38	male	adult	3	00:16:39	1	00:14:45	88.59	6	00:02:28		0	1	0	88.59
2017	15:03:00	2	98	1	7	Q39	male	adult	3	00:15:16	1	00:13:33	88.76	6	00:02:16		0	1	0	88.76
2017	15:03:00	2	99	1	7	Q39	male	adult	3	00:15:16	1	00:11:16	73.8	9	00:01:15		0	1	0	73.8
2017	15:32:00	2	100	1	7	Q39	male	adult	3	00:08:19	1	00:03:44	44.89	6	00:00:37		0	1	0	44.89
2017	15:32:00	2	101	1	7	Q39	male	adult	3	00:06:08	1	00:02:00	32.61	5	00:00:24		0	1	0	32.61
2017	15:32:00	2	102	1	7	Q39	male	adult	3	00:06:19	1	00:02:55	46.17	5	00:00:35		0	1	0	46.17
2017	15:32:00	2	103	1	7	Q39	male	adult	3	00:08:19	1	00:02:57	35.47	3	00:00:59		0	1	0	35.47
2017	15:32:00	2	104	1	7	Q39	male	adult	3	00:06:23	1	00:03:26	53.79	5	00:00:41		0	1	0	53.79
2017	15:32:00	2	105	1	7	Q39	male	adult	3	00:08:19	1	00:03:41	44.29	4	00:00:55		0	1	0	44.29
2017	13:43:00	2	113	1	1	Q42	male	adult	3	00:04:22	1	00:04:04	93.13	1	00:04:04		0	1	0	93.13
2017	13:51:00	2	118	1	2	Q45	male	adult	3	00:17:44	1	00:15:02	84.77	2	00:07:31	00:00:58	1	1	5.45	90.22
2017	13:51:00	2	119	1	2	Q45	male	adult	3	00:16:49	1	00:04:15	25.27	4	00:01:04		0	1	0	25.27
2017	13:55:00	2	44	2	5	Q21	male	adult	3	00:04:31	1	00:04:02	89.3	2	00:02:01		0	1	0	89.3
2017	13:55:00	2	45	2	5	Q21	male	adult	3	00:04:31	1	00:03:52	85.61	3	00:01:17		0	1	0	85.61
2017	13:28:00	2	62	2	1	Q29	male	adult	3	00:14:55	1	00:02:56	19.66	5	00:00:35		0	1	0	19.66
2017	13:58:00	2	64	2	2	Q30	male	adult	3	00:15:04	1	00:00:26	2.88	1	00:00:26		0	1	0	2.88
2017	14:56:00	2	65	2	1	Q31	male	adult	3	00:03:30	1	00:00:22	10.48	1	00:00:22	00:00:52	1	1	24.76	35.24
2017	14:56:00	2	86	2	2	Q8	male	adult	3	00:11:43	1	00:00:15	2.13	1	00:00:15		0	1	0	2.13
2017	13:00:00	2	110	2	4	Q41	male	adult	3	00:12:44	1	00:05:25	42.54	4	00:01:21		0	1	0	42.54
2017	13:00:00	2	111	2	4	Q41	male	adult	3	00:08:45	1	00:02:59	34.1	3	00:01:00		0	1	0	34.1
2017	15:45:00	2	28	3	17	Q16	male	adult	3	00:07:44	1	00:06:17	81.25	2	00:03:09		0	1	0	81.25
2017	15:03:00	2	78	3	5	Q37	male	adult	3	00:18:08	1	00:12:12	67.28	8	00:01:31		0	1	0	67.28
2017	15:03:00	2	79	3	5	Q37	male	adult	3	00:21:48	1	00:08:29	38.91	7	00:01:13		0	1	0	38.91
2017	16:14:00	3	49	1	5	Q23	male	adult	3	00:19:36	1	00:16:38	84.86	6	00:02:46		0	1	0	84.86
2017	16:14:00	3	50	1	5	Q23	male	adult	3	00:19:36	1	00:17:27	89.03	10	00:01:45		0	1	0	89.03
2017	16:14:00	3	51	1	5	Q23	male	adult	3	00:19:36	1	00:17:23	88.69	9	00:01:56		0	1	0	88.69
2017	16:14:00	3	52	1	5	Q23	male	adult	3	00:18:01	1	00:11:28	63.64	4	00:02:52		0	1	0	63.64
2017	16:02:00	3	106	1	2	Q40	male	adult	3	00:18:30	1	00:05:03	27.3	6	00:00:51	00:05:57	1	1	32.16	59.46
2017	12:25:00	1	1	1	6	Q2	male	subadult	4	00:15:46	0		0				0	0	0	0
2017	12:25:00	1	2	1	6	Q2	male	subadult	4	00:15:46	0		0				0	0	0	0
2017	09:50:00	1	69	1	3	Q33	male	subadult	4	00:11:55	0		0				0	0	0	0
2017	12:25:00	1	80	1	6	Q2	male	subadult	4	00:05:50	0		0				0	0	0	0
2017	12:25:00	1	81	1	6	Q2	male	subadult	4	00:03:15	0		0				0	0	0	0
2017	12:25:00	1	82	1	6	Q2	male	subadult	4	00:15:20	0		0				0	0	0	0
2017	09:55:00	1	116	2	4	Q44	male	subadult	4	00:11:26	0		0			00:03:36	1	1	31.49	31.49
2017	10:36:00	1	30	3	4	Q17	male	subadult	4	00:09:31	0		0				0	0	0	0
2017	13:00:00	2	93	2	4	Q13	male	subadult	4	00:06:37	0		0				0	0	0	0
2017	13:00:00	2	95	2	4	Q13	male	subadult	4	00:10:04	0		0				0	0	0	0
2017	14:38:00	2	21	3	17	Q16	male	subadult	4	00:07:15	0		0				0	0	0	0
2017	12:01:00	1	108	2	4	Q41	male	subadult	4	00:06:22	1	00:05:55	92.93	7	00:00:51		0	1	0	92.93
2017	13:00:00	2	112	2	4	Q41	male	subadult	4	00:12:44	1	00:04:36	36.13	2	00:02:18	00:03:32	1	1	27.75	63.88
